# Supplementary material
Source: PubMed Central journal article supplement (PMC2890298)
Supplement: NIHMS176963-supplement-Supplementary_Data.pdf [file NIHMS176963-supplement-Supplementary_Data.pdf]

## Supplemental Information

### Supplementary Methods and Materials

Ten male cynomolgus monkeys (*macaca fascicularis*) were part of a 21-month experimental time line (Figure 1A). For the first year (Naïve samples), monkeys, 5-6 years of age (average weight 4.5 kg), were acclimatized to the study environment and operant instrumentation. During this acclimatization period, the monkeys were also trained to present their leg for venipuncture to collect blood from the saphenous and/or femoral veins without the use of an anesthetic agent. Plasma samples were collected for endocrine tests, monitoring of blood alcohol levels, and for biomarker discovery and validation. Monkeys were induced to consume liquids under a schedule of food pellet deliveries (i.e., schedule-induced polydipsia (1)) as described previously for these animals (2). Induction conditions did not require food deprivation and were not associated with weight loss. The ethanol was presented in the form of 4% w/v ethanol. Following one month of 0.5 g/kg/day ethanol (two drink equivalents, Induction samples), the animals were escalated to drink 1.0 g/kg/day for 30 consecutive days, and finally, 1.5 g/kg/day for 30 consecutive days. Following the 90-day induction period of alcohol consumption, animals were given unlimited access (22 hours per day) to either ethanol or water for the next six months (Drinking samples) (2,3). Two independent samples (A and B) were collected from each state in the experimental time line (Naïve, Induction, Drinking; Figure 1A). These two independent samples were collected on different days to determine reproducibility of the plasma protein concentrations.

Plasma protein profiling was performed at Rules-Based Medicine, Inc. (Austin, TX) using standard Luminex technology (4). Plasma samples (in triplicate) were subjected to Human

Antigen MAP antigen analysis for 90 different circulating proteins. Sample and capture microspheres were thoroughly mixed and incubated at room temperature for 1 hour. Multiplexed cocktails of biotinylated reporter antibodies were then added and incubated for 1 hour. Multiplexes were developed using an excess of streptavidin-phycoerythrin solution. Analysis was performed in a Luminex 100 instrument. Unknown values for each of the analytes localized in a specific multiplex were determined using 4 and 5 parameter, weighted and non-weighted curve fitting algorithms included in the data analysis package.

Differential abundance of individual plasma proteins was determined using a conservative approach with a one-way repeated measures ANOVA and Bonferroni multiple testing correction ( $p < 0.05$ ). To identify the most consistent plasma protein changes, only those differences significant by a Student Newman-Keuls pair-wise post-hoc test ( $p < 0.05$ ) between two time points and for *both* the A and B samples were considered. Support Vector Machine (SVM) classification analysis was performed using GeneSpring 7.3 (Agilent, Santa Clara, CA) using a polynomial kernel function with no scaling factor as described previously (5). A statistical tool only recently applied to biomedical research, SVM is a supervised machine learning method that allows for classification of samples based on a hyperplane constructed in  $n$ -dimensional space where  $n$  is the number of quantitative measures. In this study, the plasma concentrations of the proteins in the biomarker panel were used to classify drinking status. Accuracy, sensitivity, specificity, PPV (positive predictive value), and NPV (negative predictive value) were determined according to standard definitions from classification analysis results (6) (Figure S1). Database searching for tissue origin of proteins was performed using Ingenuity Pathway Analysis software and Swissprot identifiers (Ingenuity, Redwood City, CA).

**Table S1. Plasma protein profiling results**

| Protein Name                                              | Protein Symbol | Bonferroni Corrected ANOVA | Post-hoc Testing   |                   |                       | Final Biomarker Panel |
|-----------------------------------------------------------|----------------|----------------------------|--------------------|-------------------|-----------------------|-----------------------|
|                                                           |                |                            | Naive vs Induction | Naive vs Drinking | Induction vs Drinking |                       |
| Acid Phosphatase, Prostate                                | ACCP           | ND                         |                    |                   |                       |                       |
| <b>Adiponectin</b>                                        | ADIPOQ         | p<0.001                    | NC                 | Decreased         | Decreased             | X                     |
| Alpha 1 Antitrypsin                                       | Serpina1a      | NC                         |                    |                   |                       |                       |
| <b>Alpha 2 Macroglobin</b>                                | A2M            | p<0.001                    | NC                 | Decreased         | Decreased             | X                     |
| Alpha-Fetoprotein                                         | AFP            | NC                         |                    |                   |                       |                       |
| Amyloid P Component, Serum                                | APCS           | p<0.001                    | Variable           | NC                | Variable              |                       |
| ApoAI                                                     | APOA1          | p<0.001                    | NC                 | Variable          | Variable              |                       |
| ApoCIII                                                   | APOC3          | p<0.001                    | NC                 | Variable          | Variable              |                       |
| ApoH                                                      | APOH           | NC                         |                    |                   |                       |                       |
| Beta 2 Microglobulin                                      | B2M            | p<0.001                    | Variable           | NC                | Variable              |                       |
| Brain-Derived Neurotrophic Factor                         | BDNF           | NC                         |                    |                   |                       |                       |
| C Reactive Protein                                        | CRP            | NC                         |                    |                   |                       |                       |
| Calcitonin                                                | CALCA          | p<0.001                    | Variable           | Decreased         | Variable              |                       |
| Carcinoembryonic Antigen-Related Cell Adhesion Molecule 5 | CEACAM5        | ND                         |                    |                   |                       |                       |
| <b>CD 40</b>                                              | CD40           | p<0.001                    | Decreased          | Decreased         | NC                    | X                     |
| CD 40 Ligand                                              | CD40LG         | p<0.001                    | Variable           | Variable          | NC                    |                       |
| Chemokine (C motif) Ligand 1                              | XCL1           | ND                         |                    |                   |                       |                       |
| Chemokine (C-C motif) Ligand 11                           | Ccl11          | p<0.001                    | Variable           | Variable          | NC                    |                       |
| Chemokine (C-C motif) Ligand 2                            | CCL2           | NC                         |                    |                   |                       |                       |
| Chemokine (C-C motif) Ligand 22                           | CCL22          | NC                         |                    |                   |                       |                       |
| <b>Chemokine (C-C motif) Ligand 3</b>                     | CCL3           | p<0.001                    | Decreased          | Decreased         | NC                    | X                     |
| <b>Chemokine (C-C motif) Ligand 4</b>                     | CCL4           | p<0.001                    | Decreased          | Decreased         | NC                    | X                     |
| Chemokine (C-C motif) Ligand 5                            | CCL5           | NC                         |                    |                   |                       |                       |
| <b>Chemokine (C-X-C motif) Ligand 5</b>                   | CXCL5          | p<0.001                    | Decreased          | Decreased         | NC                    | X                     |
| Colony Stimulating Factor 2                               | CSF2           | p<0.001                    | Variable           | NC                | Variable              |                       |
| Colony Stimulating Factor 3                               | CSF3           | ND                         |                    |                   |                       |                       |
| <b>Complement 3</b>                                       | C3             | p<0.001                    | NC                 | Decreased         | Decreased             | X                     |
| Creatine Kinase, Muscle                                   | CKM            | ND                         |                    |                   |                       |                       |
| Endothelin-1                                              | EDN1           | ND                         |                    |                   |                       |                       |
| Epidermal Growth Factor                                   | EGF            | p<0.001                    | Variable           | Variable          | NC                    |                       |
| Erythropoietin                                            | EPO            | ND                         |                    |                   |                       |                       |
| Factor III                                                | F3             | p<0.001                    | Variable           | Decrease          | NC                    |                       |
| <b>Factor VII</b>                                         | F7             | p<0.001                    | Decreased          | Decreased         | NC                    | X                     |
| Fatty Acid Binding Protein 3                              | FABP3          | p<0.001                    | Variable           | Decreased         | NC                    |                       |
| Ferritin                                                  | FT             | NC                         |                    |                   |                       |                       |
| Fibrinogen                                                | FG             | p<0.001                    | Variable           | Variable          | NC                    |                       |
| Fibroblast Growth Factor 2                                | FGF2           | ND                         |                    |                   |                       |                       |
| <b>Glutamic-Oxaloacetic Transaminase 1</b>                | GOT1           | p<0.001                    | Increased          | Increased         | NC                    | X                     |
| Glutathione S-Transferase                                 | GST            | ND                         |                    |                   |                       |                       |
| Growth Hormone                                            | GH1            | NC                         |                    |                   |                       |                       |
| Haptoglobin                                               | HP             | NC                         |                    |                   |                       |                       |
| IFN-gamma                                                 | IFNG           | ND                         |                    |                   |                       |                       |
| IgA                                                       | IgA            | NC                         |                    |                   |                       |                       |
| <b>IgE</b>                                                | IgE            | p<0.001                    | Decreased          | Decreased         | NC                    | X                     |
| IgM                                                       | IgM            | NC                         |                    |                   |                       |                       |
| Insulin                                                   | INS            | p<0.001                    | Variable           | Variable          | NC                    |                       |
| <b>Insulin-Like Growth Factor 1</b>                       | IGF1           | p<0.001                    | Decreased          | Decreased         | NC                    | X                     |
| Intercellular Adhesion Molecule 1                         | ICAM1          | ND                         |                    |                   |                       |                       |
| Interleukin 1 Receptor Antagonist                         | IL1RN          | NC                         |                    |                   |                       |                       |
| Interleukin 10                                            | IL10           | p<0.001                    | Variable           | NC                | Variable              |                       |
| Interleukin 12 Subunit p40                                | IL12-p40       | ND                         |                    |                   |                       |                       |
| Interleukin 12 Subunit p70                                | IL12-p70       | p<0.001                    | Variable           | Decreased         | Variable              |                       |
| Interleukin 13                                            | IL-13          | p<0.001                    | Variable           | NC                | Variable              |                       |
| Interleukin 15                                            | IL-15          | NC                         |                    |                   |                       |                       |
| Interleukin 16                                            | IL-16          | ND                         |                    |                   |                       |                       |
| Interleukin 18                                            | IL-18          | p<0.001                    | Variable           | Decreased         | NC                    |                       |
| Interleukin 1alpha                                        | IL-1alpha      | ND                         |                    |                   |                       |                       |
| Interleukin 1beta                                         | IL-1beta       | ND                         |                    |                   |                       |                       |
| <b>Interleukin 2</b>                                      | IL2            | p<0.001                    | Decreased          | Decreased         | NC                    | X                     |
| Interleukin 3                                             | IL-3           | ND                         |                    |                   |                       |                       |

| Protein Name                                                                        | Protein Symbol | Bonferroni Corrected ANOVA | Post-hoc Testing   |                   |                       | Final Biomarker Panel |
|-------------------------------------------------------------------------------------|----------------|----------------------------|--------------------|-------------------|-----------------------|-----------------------|
|                                                                                     |                |                            | Naive vs Induction | Naive vs Drinking | Induction vs Drinking |                       |
| Interleukin 4                                                                       | IL-4           | ND                         |                    |                   |                       |                       |
| Interleukin 5                                                                       | IL5            | NC                         |                    |                   |                       |                       |
| Interleukin 6                                                                       | IL-6           | ND                         |                    |                   |                       |                       |
| <b>Interleukin 7</b>                                                                | IL7            | p<0.001                    | Increased          | Increased         | NC                    | X                     |
| Interleukin 8                                                                       | IL8            | NC                         |                    |                   |                       |                       |
| <b>Kallikrein-Related Peptidase 3</b>                                               | KLK3           | p<0.001                    | Decreased          | Decreased         | NC                    | X                     |
| KIT Ligand                                                                          | KITLG          | p<0.001                    | Variable           | Decreased         | NC                    |                       |
| Leptin                                                                              | LSL            | ND                         |                    |                   |                       |                       |
| Lipoprotein (a)                                                                     | LPA            | ND                         |                    |                   |                       |                       |
| Lymphotoxin Alpha                                                                   | LTA            | NC                         |                    |                   |                       |                       |
| <b>Matrix Metalloproteinase 2</b>                                                   | MMP2           | p<0.001                    | Decreased          | Decreased         | NC                    | X                     |
| Matrix Metalloproteinase 3                                                          | MMP3           | ND                         |                    |                   |                       |                       |
| Matrix Metalloproteinase 9                                                          | MMP9           | p<0.001                    | NC                 | Variable          | NC                    |                       |
| Myeloperoxidase                                                                     | MPO            | NC                         |                    |                   |                       |                       |
| Myoglobin                                                                           | MB             | NC                         |                    |                   |                       |                       |
| Neighbor of BRCA1 Gene 1                                                            | NBR1           | ND                         |                    |                   |                       |                       |
| NMDA receptor regulated 1                                                           | NARG1          | ND                         |                    |                   |                       |                       |
| Pregnancy-Associated Plasma protein A, Pappalysin 1                                 | PAPPA          | ND                         |                    |                   |                       |                       |
| S100 calcium binding protein A12                                                    | S100A12        | ND                         |                    |                   |                       |                       |
| Serine (or cysteine) Peptidase Inhibitor, Clade E, Member 1                         | Serpine1       | p<0.001                    | Variable           | NC                | Increase              |                       |
| Serpin Peptidase Inhibitor, Clade A (alpha-1 antiproteinase, antitrypsin), Member 7 | Serpina7       | ND                         |                    |                   |                       |                       |
| Sex Hormone-Binding Globulin                                                        | SHBG           | p<0.001                    | Variable           | Variable          | NC                    |                       |
| <b>Thrombopoietin</b>                                                               | THPO           | p<0.001                    | Decreased          | Decreased         | NC                    | X                     |
| Thyroid Stimulating Hormone                                                         | TSH            | ND                         |                    |                   |                       |                       |
| Tissue Inhibitor of Matrix Metalloproteinase-1                                      | TIMP1          | p<0.001                    | Variable           | Decrease          | NC                    |                       |
| Tumor Necrosis Factor Alpha                                                         | TNFA           | ND                         |                    |                   |                       |                       |
| Tumor Necrosis Factor Receptor Superfamily, Member 1B                               | TNFRSF1B       | NC                         |                    |                   |                       |                       |
| Vascular Cell Adhesion Molecule 1                                                   | VCAM1          | NC                         |                    |                   |                       |                       |
| <b>Vascular Endothelial Growth Factor A</b>                                         | VEGFA          | p<0.001                    | Decreased          | Decreased         | NC                    | X                     |
| von Willebrand Factor                                                               | VWF            | ND                         |                    |                   |                       |                       |

ND, not detected; NC, no change

Note: Proteins in the final biomarker panel are indicated in bold and in the rightmost column.

**Table S2. Tissues-of-origin for proteins in biomarker panel.** This graph illustrates the anatomical origin for the various components of the biomarker panel. Clearly, proteins originate from a number of different organ systems and some proteins may come from multiple organ systems. This table was generated with information in the Ingenuity Pathway Analysis system (Ingenuity Systems, Redwood City, CA).

| Protein Symbol | Alternate Symbol | Entrez Gene Name                            | Blood | Peripheral Immune Cells | Brain | Adipose | Bladder | Epidermis | Heart | Kidney | Large Intestine | Liver | Lung | Mammary Gland | Ovary | Pancreas | Placenta | Prostate Gland | Retina | Salivary Gland | Skeletal Muscle | Small Intestine | Spleen | Stomach | Testis | Thymus | Uterus |   |
|----------------|------------------|---------------------------------------------|-------|-------------------------|-------|---------|---------|-----------|-------|--------|-----------------|-------|------|---------------|-------|----------|----------|----------------|--------|----------------|-----------------|-----------------|--------|---------|--------|--------|--------|---|
| A2M            |                  | alpha-2-macroglobulin                       | X     | X                       |       |         |         |           | X     | X      |                 | X     | X    |               | X     |          | X        |                | X      |                |                 |                 |        |         |        |        | X      |   |
| ADIPOQ         |                  | adiponectin                                 | X     | X                       | X     | X       | X       | X         | X     | X      | X               |       | X    | X             | X     | X        | X        | X              |        | X              | X               | X               | X      |         | X      | X      | X      |   |
| C3             |                  | complement component 3                      | X     | X                       | X     | X       | X       | X         | X     |        | X               | X     | X    | X             | X     |          | X        | X              | X      | X              | X               |                 | X      | X       |        | X      | X      |   |
| CCL3           | MIP-1alpha       | chemokine (C-C motif) ligand 3              | X     | X                       | X     |         |         |           |       |        |                 |       |      |               |       |          |          |                |        |                |                 |                 |        |         |        |        | X      |   |
| CCL4           | MIP-1beta        | chemokine (C-C motif) ligand 4              | X     | X                       |       |         |         |           |       | X      |                 | X     |      |               |       |          |          |                |        |                |                 |                 | X      | X       |        |        | X      |   |
| CD40           |                  | CD40 molecule, TNF receptor family member 5 | X     | X                       | X     | X       | X       |           |       | X      | X               | X     | X    | X             | X     | X        | X        |                | X      |                |                 | X               | X      | X       | X      | X      | X      |   |
| CXCL5          | ENA-78           | chemokine (C-X-C motif) ligand 5            | X     | X                       |       |         |         |           |       |        |                 |       |      |               |       |          |          |                |        |                |                 |                 |        |         |        |        |        |   |
| F7             | Factor 7         | coagulation factor VII                      | X     | X                       |       |         |         |           |       |        |                 | X     |      |               |       |          |          |                |        |                |                 |                 |        |         |        |        |        |   |
| GOT1           | SGOT             | glutamic-oxaloacetic transaminase 1         | X     | X                       | X     | X       | X       | X         | X     | X      | X               | X     | X    | X             | X     | X        | X        | X              | X      | X              | X               | X               |        | X       |        | X      | X      |   |
| IgE            |                  | immunoglobulin E                            | X     | X                       |       |         |         |           |       |        |                 |       |      |               |       |          |          |                |        |                |                 |                 |        |         |        |        |        |   |
| IGF1           |                  | insulin-like growth factor 1                | X     | X                       | X     | X       | X       | X         | X     | X      | X               | X     | X    | X             | X     | X        | X        | X              | X      | X              | X               | X               | X      | X       | X      | X      | X      | X |
| IL2            |                  | interleukin 2                               | X     | X                       |       |         |         |           |       |        |                 |       |      |               |       | X        |          |                |        |                |                 |                 | X      |         |        |        |        |   |
| IL7            |                  | interleukin 7                               | X     | X                       |       | X       |         |           |       |        |                 |       |      |               |       |          |          |                |        |                |                 | X               | X      |         |        | X      |        |   |
| KLK3           | PSA              | kallikren-related peptidase 3               | X     |                         |       |         |         |           |       |        |                 |       |      | X             |       |          |          | X              |        | X              |                 |                 |        |         |        |        |        |   |
| MMP2           |                  | matrix metallo-peptidase 2                  | X     | X                       |       | X       | X       | X         | X     | X      | X               | X     | X    |               | X     | X        | X        |                | X      |                |                 |                 |        |         |        |        | X      |   |
| THPO           |                  | thrombopoietin                              | X     | X                       | X     |         |         |           |       |        |                 | X     |      |               |       |          |          |                |        |                |                 |                 |        |         |        |        |        |   |
| VEGFA          |                  | vascular endothelial growth factor A        | X     | X                       | X     | X       | X       | X         | X     | X      | X               | X     | X    | X             | X     | X        | X        | X              | X      | X              | X               | X               | X      | X       | X      | X      | X      | X |

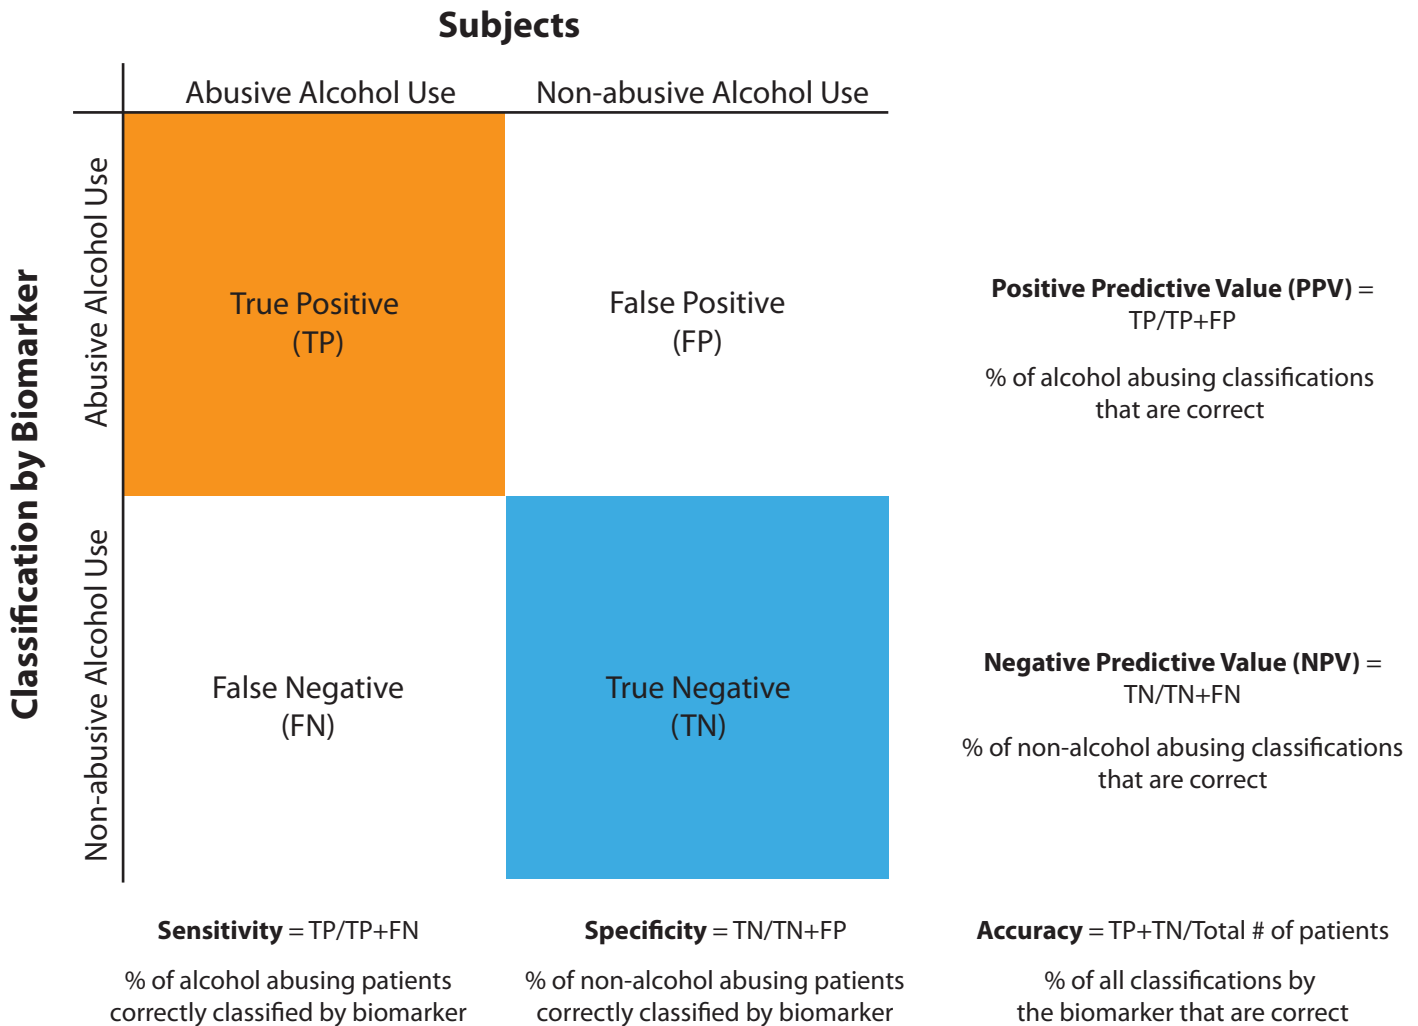

**Figure S1. Statistical evaluation of biomarker performance.**

Unlike traditional statistics that examine differences between populations, diagnostics are intended to be informative of the individual patient. A biomarker's ability to correctly classify subjects can be summarized by sensitivity, specificity, positive predictive value, negative predictive value, and accuracy measures. In this example, the ability to classify abusive and non-abusive alcohol use is portrayed. Sensitivity and specificity are the most commonly used measures, and, in this case, they provide the percentages of subjects correctly identified as abusing and not abusing alcohol respectively.

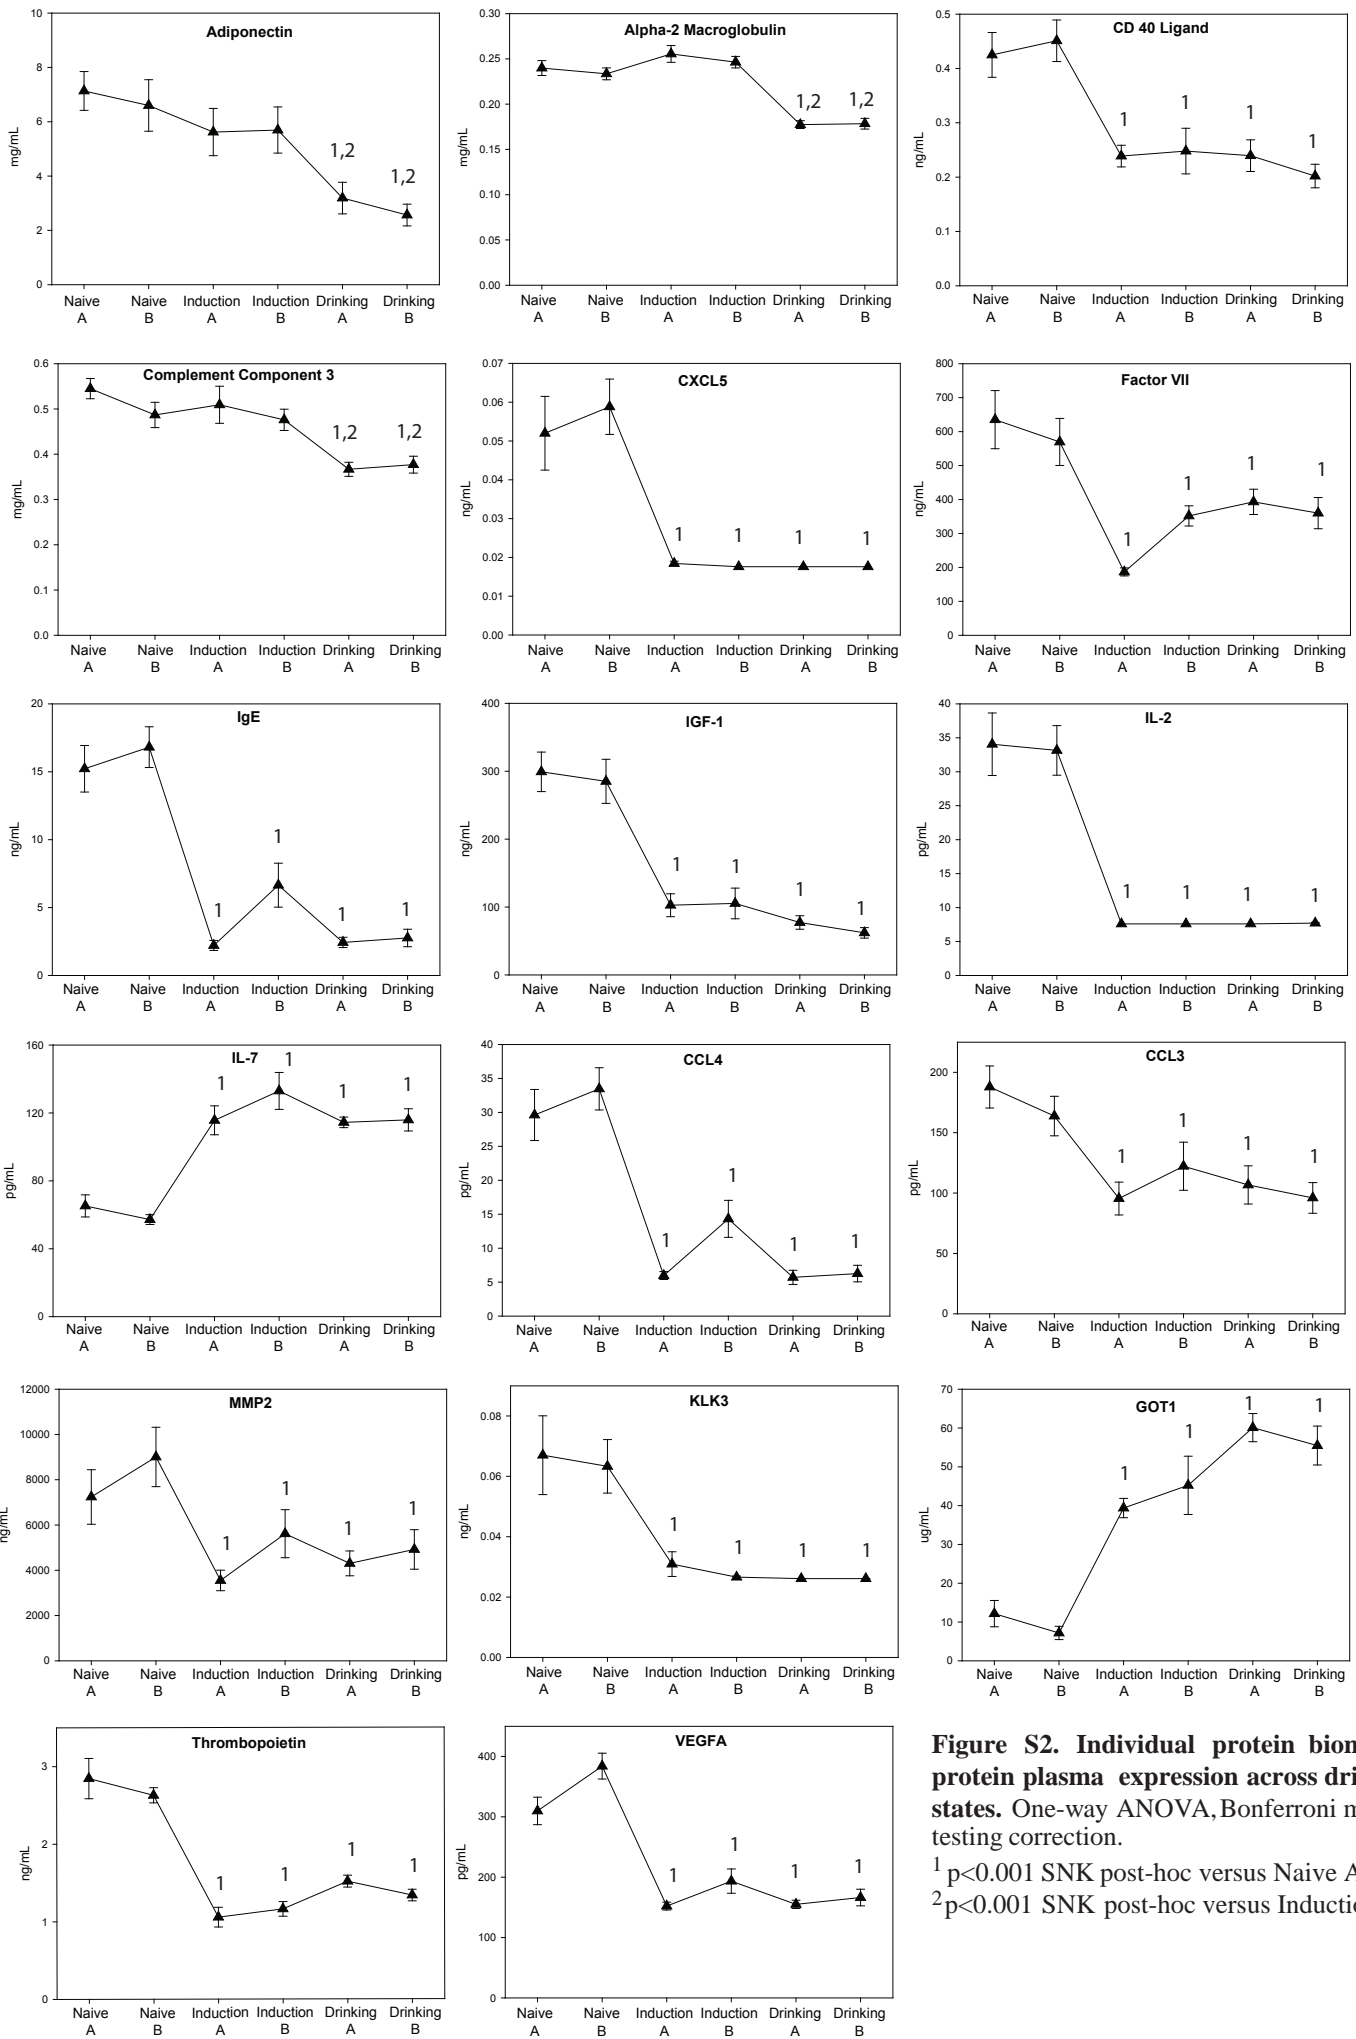

**Figure S2. Individual protein biomarker protein plasma expression across drinking states.** One-way ANOVA, Bonferroni multiple testing correction.  
<sup>1</sup> p<0.001 SNK post-hoc versus Naive A & B  
<sup>2</sup> p<0.001 SNK post-hoc versus Induction A & B

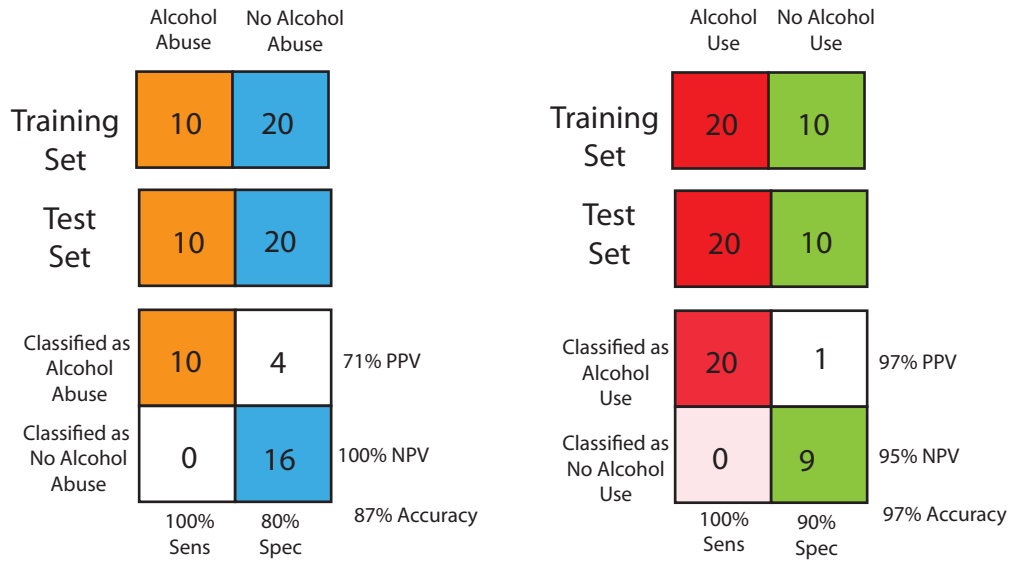

**Figure S3. Classification analysis using a training set/test set approach.** Using A samples from each drinking state as the training set the B samples were classified using a support vector machine approach. Similar results were obtained from flipping of training and test sets. PPV, positive predictive value; NPV, negative predictive value; Sens, sensitivity; Spec, specificity.



1. Falk D (1961): Production of polydipsia in normal rats by an intermittent food schedule. *Science* 133: 195-196.
2. Grant KA, Leng X, Green HL, Szeliga KT, Rogers LS, Gonzales SW (2008): Drinking typography established by scheduled induction predicts chronic heavy drinking in a monkey model of ethanol self-administration. *Alcohol Clin Exp Res* 32: 1824-1838.
3. Vivian JA, Green HL, Young JE, Majerksy LS, Thomas BW, Shively CA, *et al.* (2001): Induction and maintenance of ethanol self-administration in cynomolgus monkeys (*Macaca fascicularis*): long-term characterization of sex and individual differences. *Alcohol Clin Exp Res* 25: 1087-1097.
4. Vignali DA (2000): Multiplexed particle-based flow cytometric assays. *J Immunol Methods* 243: 243-255.
5. Freeman WM, Bixler GV, Brucklacher RM, Lin CM, Patel KM, Vanguilder HD, *et al.* (2009): A multistep validation process of biomarkers for preclinical drug development. *Pharmacogenomics J* Dec 8 [Epub ahead of print].
6. Freeman WM, Vrana KE (2010): Future prospects for biomarkers of alcohol consumption and alcohol-induced disorders. *Alcohol Clin Exp Res* In press.
